# Supplementary material for: A Plant-Produced Porcine Parvovirus 1-82 VP2 Subunit Vaccine Protects Pregnant Sows against Challenge with a Genetically Heterologous PPV1 Strain
Source: Vaccines (Basel). 2022 Dec 26;11(1):54. doi: 10.3390/vaccines11010054 (PMC9867127; doi:10.3390/vaccines11010054)
Supplement: Supplementary file 1 [file vaccines-11-00054-s001.zip › vaccines-2086015-SM.pdf]

# A Plant-Produced Porcine Parvovirus 1-82 VP2 Subunit Vaccine Protects Pregnant Sows against Challenge with a Genetically Heterologous PPV1 Strain

**Supplementary Table S1.** Genetic diversity of VP2 amino acid (aa) sequences from different PPV1 strains. NADL-2, Kresse, Challenge, IDT, Tomau, T142, PVK2, and 27a are reference PPV1 strains, while strains 49, 25, 82, 13, 20, 21, 22, and 23 were identified in this study. The numbers in VP2 aa column are specified PPV1 VP2 aa sequence positions. The single letter codes represent the mutated amino acids, relative to the VP2 sequence of the NADL-2 reference strain; –, unmutated.

| VP2 aa | PPV1 strain |        |           |     |       |      |      |     |    |    |    |    |    |    |    |    |
|--------|-------------|--------|-----------|-----|-------|------|------|-----|----|----|----|----|----|----|----|----|
|        | NADL-2      | Kresse | Challenge | IDT | Tomau | T142 | PVK2 | 27a | 49 | 25 | 82 | 13 | 20 | 21 | 22 | 23 |
| 28     | G           | –      | –         | –   | –     | –    | –    | –   | S  | S  | –  | –  | –  | –  | –  | –  |
| 45     | T           | S      | S         | S   | S     | S    | S    | S   | S  | S  | S  | S  | S  | S  | S  | S  |
| 143    | Q           | –      | –         | –   | –     | –    | –    | –   | R  | –  | –  | –  | –  | –  | –  | –  |
| 215    | I           | T      | T         | T   | T     | T    | –    | T   | T  | T  | T  | T  | T  | T  | T  | T  |
| 228    | Q           | –      | –         | –   | –     | –    | –    | E   | –  | –  | E  | –  | –  | –  | –  | –  |
| 270    | D           | –      | –         | –   | –     | –    | –    | –   | –  | –  | N  | –  | –  | –  | –  | –  |
| 320    | I           | –      | –         | T   | T     | –    | –    | –   | –  | –  | –  | –  | T  | T  | T  | –  |
| 378    | D           | G      | G         | G   | G     | G    | G    | G   | G  | G  | G  | G  | G  | G  | G  | G  |
| 383    | H           | Q      | Q         | –   | Q     | Q    | Q    | Q   | Q  | Q  | Q  | Q  | Q  | Q  | Q  | Q  |
| 407    | K           | –      | –         | N   | N     | –    | –    | –   | R  | R  | –  | R  | –  | –  | –  | –  |
| 414    | A           | –      | –         | –   | –     | –    | –    | S   | T  | T  | S  | –  | –  | –  | –  | –  |
| 419    | E           | –      | –         | –   | –     | –    | –    | Q   | –  | –  | Q  | –  | –  | –  | –  | –  |
| 436    | S           | P      | P         | P   | P     | P    | P    | T   | T  | T  | T  | P  | P  | P  | P  | P  |
| 549    | T           | –      | –         | –   | –     | –    | –    | –   | A  | –  | –  | –  | –  | –  | –  | –  |
| 565    | R           | K      | K         | K   | K     | K    | K    | K   | K  | K  | K  | K  | K  | K  | K  | K  |
| 570    | Y           | –      | –         | –   | –     | –    | H    | –   | H  | –  | H  | H  | H  | H  | H  | H  |
| 579    | Y           | –      | –         | –   | –     | –    | –    | –   | –  | –  | –  | –  | –  | S  | S  | –  |
